# Supplementary material for: Mesoporous silica nanoparticles with dual-targeting agricultural sources for enhanced cancer treatment via tritherapy
Source: Royal Society of Chemistry journal article supplement (doi:10.1039/d3ra02068a), 2023-01-01
Supplement: d3ra02068a1.pdf [file d3ra02068a1.pdf]

## Supporting Information

# Mesoporous Silica Nanoparticles with Dual-Targeting Agricultural Sources for Enhanced Cancer Treatment via Tritherapy

Yu-Ya Huang<sup>1</sup>, Zui-Harn Lee<sup>1</sup>, Kai-Chi Chang<sup>2\*</sup>, Zhi-Yuan Wu<sup>1</sup>, Cheng-Chang Lee<sup>1</sup>,  
Min-Hsuan Tsou<sup>1</sup>, Hsiu-Mei Lin<sup>1, 3, 4\*</sup>

<sup>1</sup>National Taiwan Ocean University, Department of Bioscience and Biotechnology

<sup>2</sup>National Taiwan Ocean University, Bachelor Degree Program in Marine Biotechnenology

<sup>3</sup>National Taiwan Ocean University, Center of Excellence for the Oceans

<sup>4</sup>National Taiwan Ocean University, Center of Excellence for Ocean Engineering

\*Corresponding author address: No. 2, Beining Rd., Zhongzheng Dist., Keelung City  
202, Taiwan (R.O.C.)

Tel./Fax: +886-2-2462-2192

E-mail: [hmlin@mail.ntou.edu.tw](mailto:hmlin@mail.ntou.edu.tw)

Table S1. Inductively coupled plasma mass spectrometry (ICP-MS) analysis of Europium (Eu), Gadolinium (Gd) and Bismuth (Bi) in rMSN, rMSN-EuGd and rMSN-EuGd-Bi.

| <b>Sample</b><br><b>Weight (%)</b> | <b>rMSN</b> | <b>rMSN-EuGd</b> | <b>rMSN-EuGd-Bi</b> |
|------------------------------------|-------------|------------------|---------------------|
| <b>Eu</b>                          | 0           | 2.70             | 2.61                |
| <b>Gd</b>                          | 0           | 2.83             | 2.71                |
| <b>Bi</b>                          | 0           | 0                | 5.80                |

Table S2. Zeta potentials and dynamic light scattering (DLS) particle size distributions.

|                     | rMSN-EuGd    | rMSN-EuGd-Bi | rMSN-EuGd-Bi-NH <sub>2</sub> | rMSN-EuGd-Bi-HA | rMSN-EuGd-Bi-HA-FA |
|---------------------|--------------|--------------|------------------------------|-----------------|--------------------|
| Zeta potential (mV) | -29.5 ± 0.23 | -13.8 ± 0.19 | -8.06 ± 0.24                 | -13.3 ± 0.25    | 12.0 ± 0.16        |
| Particles size (nm) | 248.8 ± 2.3  | 268.2 ± 1.9  | 296.3 ± 2.4                  | 343.6 ± 2.5     | 350.5 ± 1.6        |

Table S3. Molecule content percentage of the different nanoparticles prepared by thermogravimetric analysis (TGA).

| <b>rMSN-EuGd</b> | <b>-NH<sub>2</sub></b> | <b>-CPT</b> | <b>-HA</b> | <b>-FA</b> |
|------------------|------------------------|-------------|------------|------------|
| <b>Weight %</b>  | 2.68                   | 4.29        | 11.86      | 30.3       |
| <b>mg/g</b>      | 34.69                  | 55.53       | 135.53     | 393.50     |

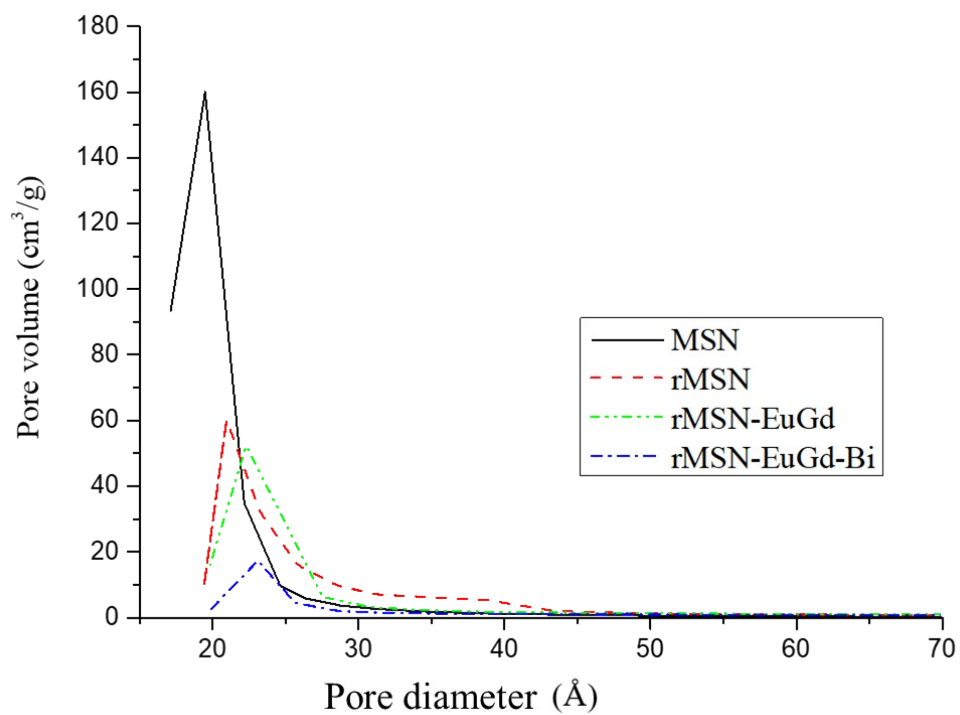

Figure S1. BJH pore size distribution curves of MSN, rMSN, rMSN-EuGd and rMSN-EuGd-Bi.

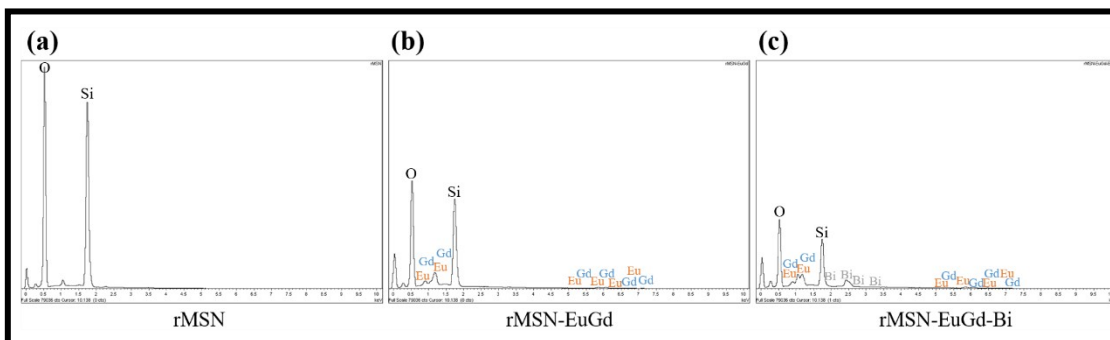

Figure S2. Energy dispersive X-ray analysis spectrum of rMSN, rMSN-EuGd and rMSN-EuGd-Bi.

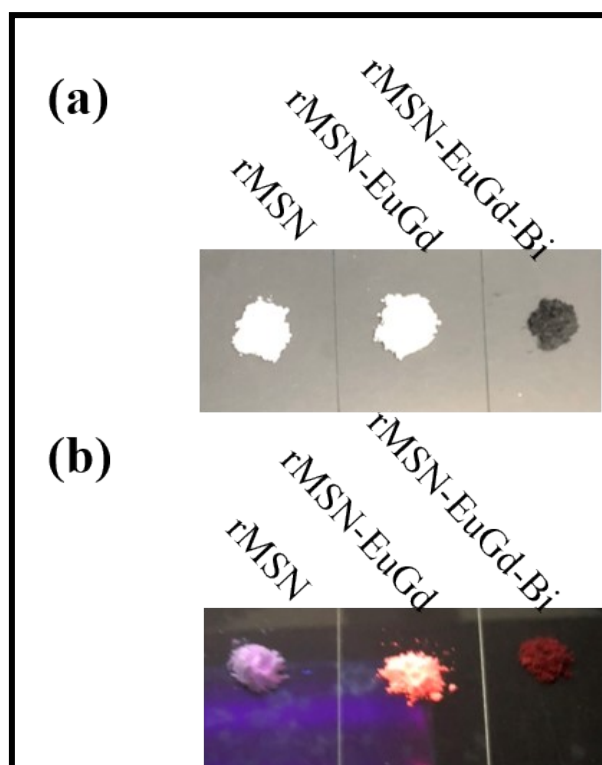

Figure S3. Images of rMSN, rMSN-EuGd and rMSN-EuGd-Bi (a) irradiated by a natural light source and (b) irradiated by ultraviolet light with 254 nm.

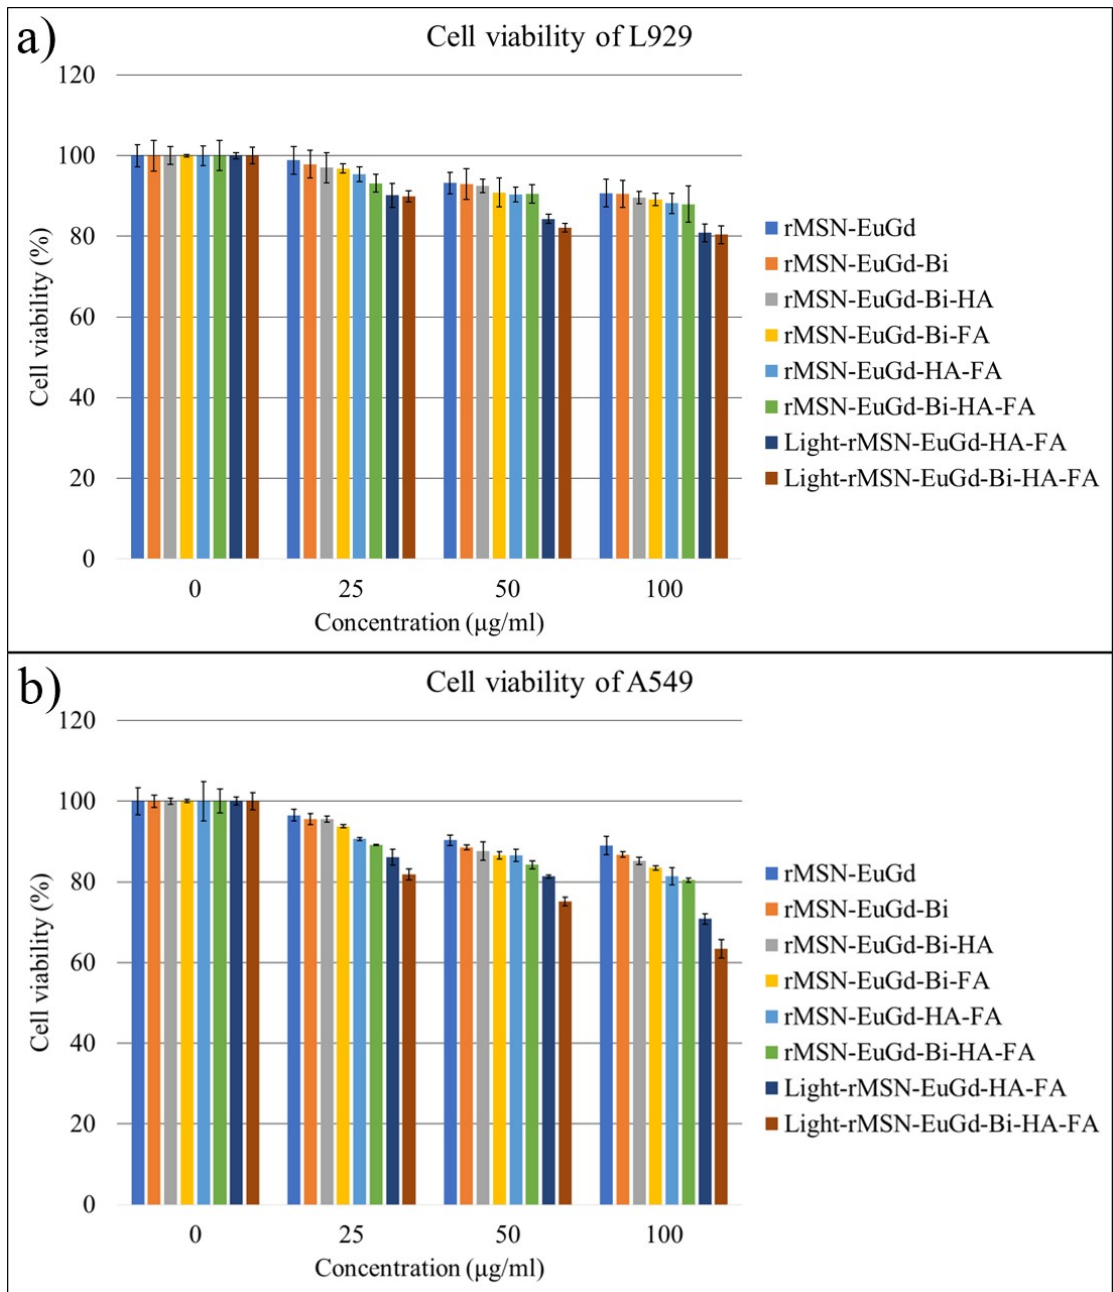

Figure S4. MTT assays of 0-100 µg/ml rMSN-EuGd, rMSN-EuGd-Bi, rMSN-EuGd-Bi-HA, rMSN-EuGd-Bi-FA, rMSN-EuGd-HA-FA, rMSN-EuGd-Bi-HA-FA, Light-rMSN-EuGd-HA-FA, and Light-rMSN-EuGd-Bi-HA-FA (lighting condition: 808 nm irradiation for 15 mins) to a) L929 cell; b) A549 cell.

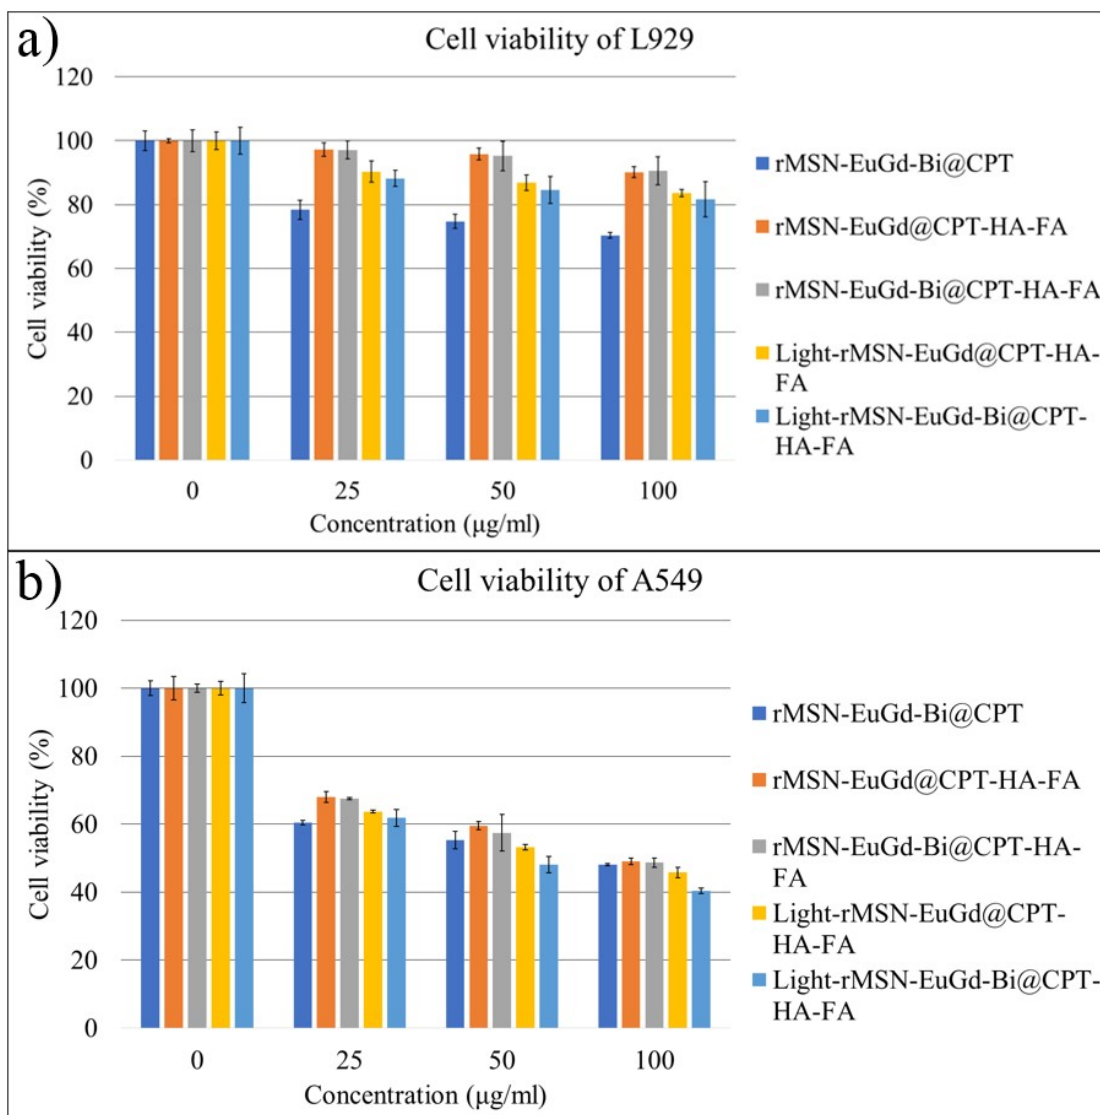

Figure S5. MTT assays of 0- 100 µg/ml rMSN-EuGd-Bi@CPT, rMSN-EuGd@CPT-HA-FA, rMSN-EuGd-Bi@CPT-HA-FA, Light-rMSN-EuGd@CPT-HA-FA and Light-rMSN-EuGd-Bi@CPT-HA-FA (lighting condition: 808 nm irradiation for 15 mins) to a) L929 cell; b) A549 cell.

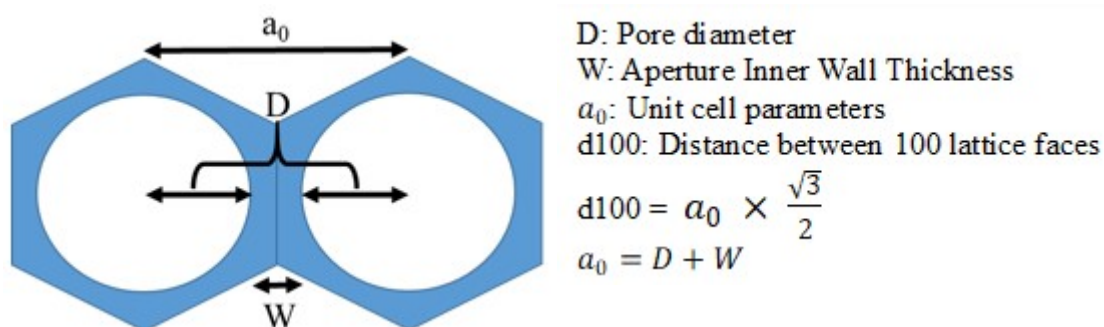

Figure S6. Structural parameters of mesoporous materials.
